# Supplementary material
Source: publisher figshare collection journal article supplement (https://aacr.figshare.com/articles/dataset/_/22479626)
Supplement: Supplementary file 1 [file 39931124]

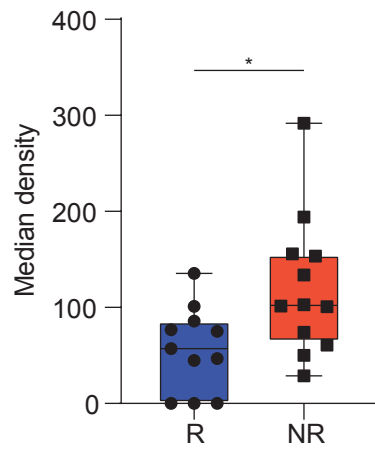

**Supplementary Figure 3. FOXP3 evaluated on-treatment.**

FOXP3 IHC staining evaluated on-treatment between responders (R; TRG 1-2) and non-responders (NR; TRG 3-5 or progression before surgery) statistically tested with the Mann–Whitney U between both groups.
